# Supplementary material for: An ultrasensitive colorimetric sensor for efficient detection of Hg2+ at physiological pH
Source: Royal Society of Chemistry journal article supplement (doi:10.1039/c5ay00212e), 2015-01-01

Electronic Supplementary Information (ESI)

**An ultrasensitive colorimetric sensor for efficient detection of Hg<sup>2+</sup> at  
physiological pH**

D. Nanda Kumar, A. Rajeshwari, Sruthi Ann Alex, N. Chandrasekaran,

Amitava Mukherjee\*

Centre for Nanobiotechnology, VIT University, Vellore, India

**\*Corresponding author**

**Dr. Amitava Mukherjee**

**Senior Professor & Deputy Director**

**Centre for Nanobiotechnology**

**VIT University, Vellore - 632014**

**Email: [amit.mookerjea@gmail.com](mailto:amit.mookerjea@gmail.com), [amitav@vit.ac.in](mailto:amitav@vit.ac.in)**

**Phone: 91 416 2202620**

**Fax: 91-416-2243092**

## 1. Materials and methods:

### 1.1. Chemicals and stock solutions

Silver nitrate ( $\text{AgNO}_3$ ), trisodium citrate dihydrate ( $\text{C}_6\text{H}_5\text{Na}_3\text{O}_7 \cdot 2\text{H}_2\text{O}$ ), and sodium borohydride ( $\text{NaBH}_4$ ) were procured from SRL Pvt. Ltd (India). Acetylcholinesterase (from *Electrophorus electricus*), and Mercury (II) chloride were purchased from Sigma-Aldrich, India. Tris (hydroxymethyl) aminomethane and Acetylthiocholine Iodide (ATChI) were obtained from Himedia Laboratories Pvt. Ltd (India). The heavy metal salts like  $\text{Al}^{3+}$ ,  $\text{Ni}^{2+}$ ,  $\text{Cr}^{3+}$ ,  $\text{Cd}^{2+}$ ,  $\text{Mg}^{2+}$ , and  $\text{Zn}^{2+}$  were purchased from Sigma-Aldrich, India, whereas  $\text{Fe}^{2+}$ ,  $\text{Fe}^{3+}$ ,  $\text{Cr}^{6+}$ ,  $\text{Pb}^{2+}$ , and  $\text{Mn}^{2+}$  were from SRL Pvt. Ltd (India). The cleaning of glassware apparatus was done with aqua regia solution, following which they were rinsed with Milli-Q water at least thrice and dried thoroughly. All experiments were performed with analytical grade chemical reagents without additional purification.

The stock solutions and further dilutions were all freshly prepared in Tris buffer (10 mM, pH 7.4). Stock solutions of AChE (400 mU) and ATChI (10 mM) were kept at 4 °C when not in use. Iodide ions in acetylthiocholine poses as a hindrance for lower level detection of  $\text{Hg}^{2+}$ . [1] Therefore, washing out of iodide ions by  $\text{AgNO}_3$  and the removal of excess  $\text{Ag}^+$  ions using NaCl was necessary. After treatment, final ATCh concentration was ~10 mM.

### 1.2. Synthesis of silver nanoparticles (AgNPs)

Synthesis of silver nanoparticles capped with sodium citrate was performed using slight modifications to Creighton's method [2]. 125  $\mu\text{L}$  of 100 mM  $\text{AgNO}_3$  solution was added to 50 mL Milli-Q water under vigorous stirring and ice-cold condition. Trisodium citrate (125  $\mu\text{L}$ , 100 mM) solution was added to this as a stabilizing agent. After an incubation of few minutes, 3 mL

of 5 mMNaBH<sub>4</sub> was added. A prominent color change from colorless to pale yellow color was observed as a consequence of the rapid reduction of Ag ions byNaBH<sub>4</sub> and the formation of AgNPs. After stirring for 30 min, the colloidal AgNPs were stored for 24 hin dark condition.

### *1.3. Instrumentation*

UV-visible absorption spectroscopy was performed for the synthesized AgNPs and reaction mixture using UV-2600 (Shimadzu, Tokyo, Japan) in the spectral range starting from 200 to 800 nm.The particle size distribution ofAgNPsbefore and afterHg<sup>2+</sup> addition were acquiredusing a particle size analyzer (90 Plus Particle Analyzer, Brookhaven instruments Corporation, NY, USA).

### **References**

1. J. Sun, L. Guo, Y. Bao and J. Xie, *Biosens. Bioelectron.*, 2011, **28**, 152–157.
2. M. Elavarasi, A. Rajeshwari, S.A. Alex, D. N. Kumar, N. Chandrasekaran and A. Mukherjee, *Anal. Methods*.2014, **6**, 5161–5167.

## 2. Supporting figures:

**Figure S1.** UV-visible spectra for AgNPs with  $\text{Hg}^{2+}$  ( $10^{-9}$  to  $10^{-12}$  M) added in the presence of ATCh ( $80 \mu\text{M}$ ) and AChE ( $400 \text{ mU mL}^{-1}$ )

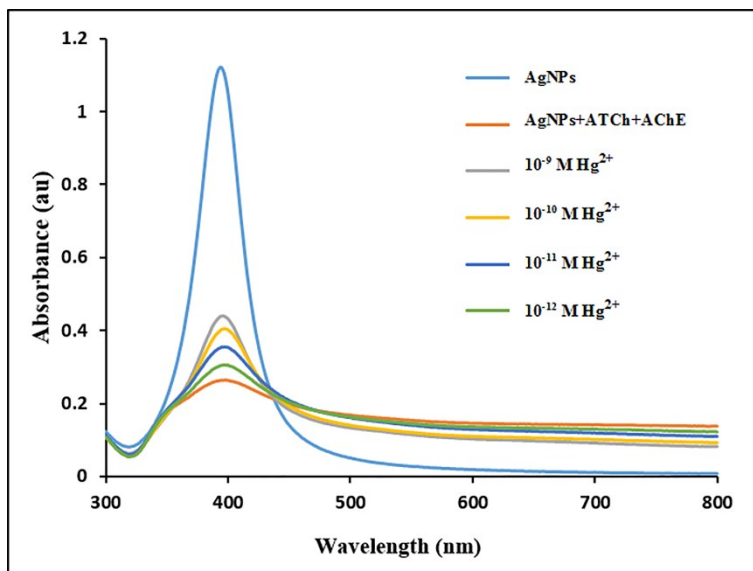

**Figure S2.** Hydrodynamic size distribution for (A) synthesized AgNPs and (B) addition of AChE (400 mU mL<sup>-1</sup>) and ATCh (80 μM) to the AgNPs.

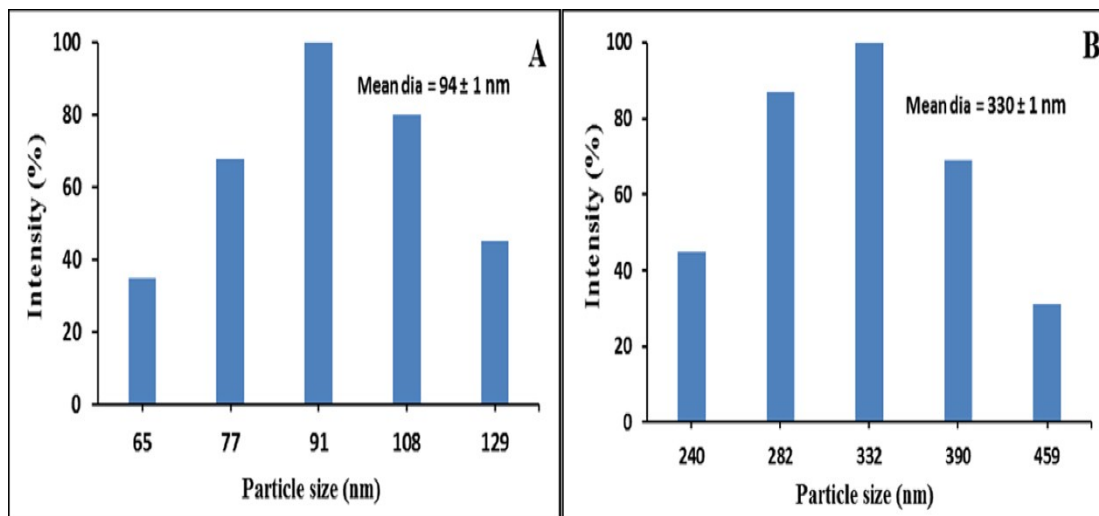

**Figure S3.** UV-visible spectral changes for AgNPs in the presence of ATCh (80  $\mu\text{M}$ ), AChE (400  $\text{mU mL}^{-1}$ ) and  $\text{Hg}^{2+}$  (1  $\text{nM}$ ) alone and in presence of AgNPs, AChE and ATCh.

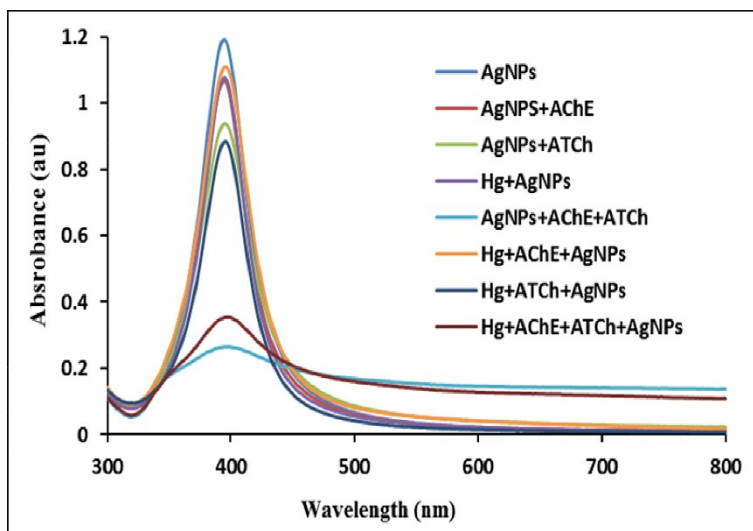

**Figure S4.** Hydrodynamic size distribution for AgNPs after addition of AChE(400 mU mL<sup>-1</sup>), ATCh(80 μM) and various concentrations of Hg<sup>2+</sup>(**A**)10<sup>-12</sup>M (**B**), 10<sup>-11</sup>M (**C**), 10<sup>-10</sup>M and(**D**)10<sup>-9</sup>M.

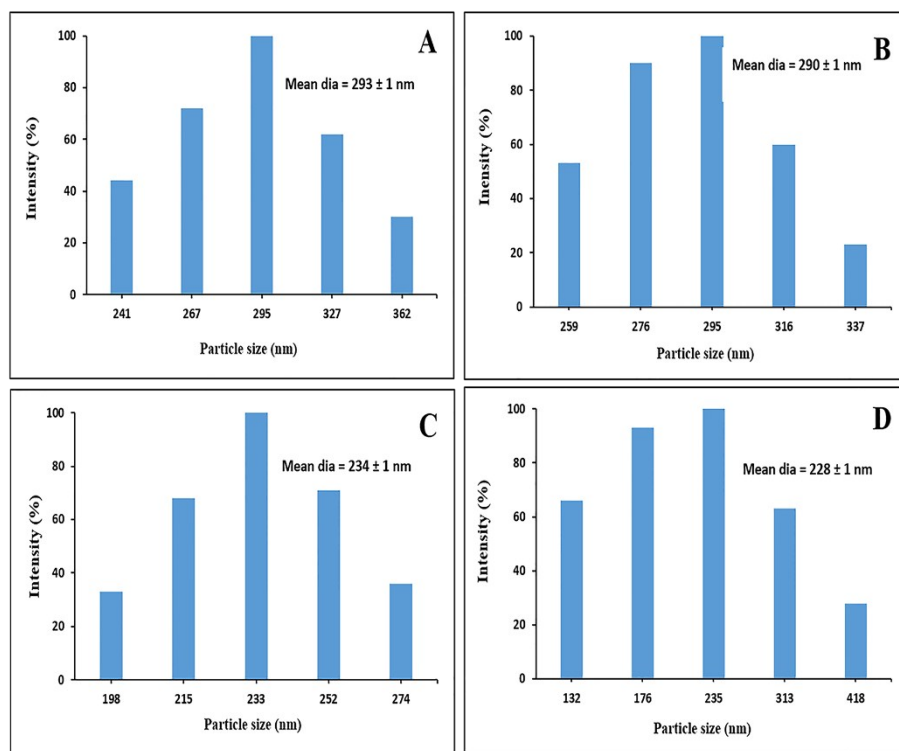

**Figure S5.** UV-visible spectra for AgNPs in presence of stimulated body fluid alone.

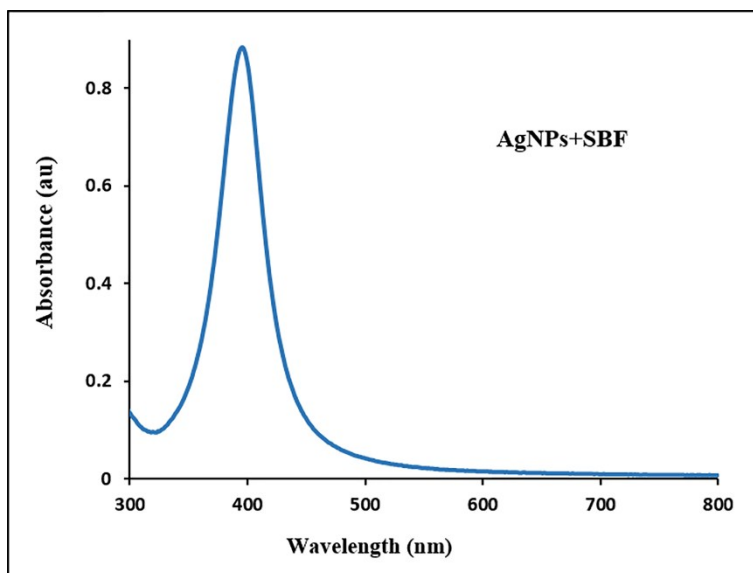

Supplement: c5ay00212e1.pdf [file c5ay00212e1.pdf]
